# Supplementary material for: An automated quantitative analysis of cell, nucleus and focal adhesion morphology
Source: PubMed Central journal article supplement (PMC5877879; doi:10.1371/journal.pone.0195201), 2018-03-30
Supplement: pone.0195201.s001.pdf [file pone.0195201.s001.pdf]

|                            | Berginski et al. | Broussard et al. | Carpenter et al. | Horzum et al. | Würflinger et al. | Buskermolen et al. |
|----------------------------|------------------|------------------|------------------|---------------|-------------------|--------------------|
| <b>Properties</b>          |                  |                  |                  |               |                   |                    |
| Segmentation               | v                | v                | v                | x             | v                 | v                  |
| Automated                  | v                | v                | x                | x             | v                 | v                  |
| Batch processing           | v                | v                | v                | x             | v                 | v                  |
| Open source                | ?                | ?                | v                | v             | x                 | v                  |
| Robustness                 | v                | v                | x                | x             | v                 | v                  |
| <b>Detectable features</b> |                  |                  |                  |               |                   |                    |
| Cell                       | x                | x                | v                | x             | x                 | v                  |
| Nucleus                    | x                | x                | v                | x             | x                 | v                  |
| FAs                        | v                | v                | v                | v             | v                 | v                  |

FAs = focal adhesions
